# Supplementary material for: The landscape of metastatic progression patterns across major human cancers
Source: PubMed Central journal article supplement (PMC4381616; doi:10.18632/oncotarget.2677), 2014-11-04
Supplement: oncotarget-06-570-s001.pdf [file oncotarget-06-570-s001.pdf]

## The landscape of metastatic progression patterns across major human cancers

### Supplementary Material

**Supplementary Table 1:** Overview of three different autopsy studies investigating metastatic disease progression across major cancer types.

|                                                              | <b>Autopsy studies on metastatic progression patterns across major human cancers</b>                 |                                                                                                        |                                                                                                                         |
|--------------------------------------------------------------|------------------------------------------------------------------------------------------------------|--------------------------------------------------------------------------------------------------------|-------------------------------------------------------------------------------------------------------------------------|
| <b>General study characteristics</b>                         | <b>Abrams et al. (1950)</b>                                                                          | <b>diSibio/French (2008)</b>                                                                           | <b>Budczies et al. (2014)</b>                                                                                           |
| Major aims of the study                                      | - description of metastatic patterns                                                                 | - description of metastatic patterns                                                                   | - description of metastatic patterns<br>- determination of the frequency of metastases<br>- prediction of primary sites |
| No. of cases analyzed                                        | 1000                                                                                                 | 3827                                                                                                   | 1008                                                                                                                    |
| Period in which autopsies were performed                     | 1943 – 1947                                                                                          | 1914 – 1943                                                                                            | 2000 – 2013                                                                                                             |
| Tumor origin                                                 | epithelial                                                                                           | epithelial                                                                                             | epithelial                                                                                                              |
| Treatment                                                    | n/a <sup>#</sup>                                                                                     | No chemotherapy or radiation                                                                           | Surgery, chemotherapy, and radiation                                                                                    |
| No. of primary cancers analyzed                              | 18* (36)                                                                                             | 41                                                                                                     | 16                                                                                                                      |
| No. of metastasis sites analyzed                             | 44                                                                                                   | 30                                                                                                     | 20                                                                                                                      |
| Additional influencing factors investigated                  | -                                                                                                    | -                                                                                                      | - tobacco smoking<br>- histological type                                                                                |
| <b>Basic and comparable results of the analyses</b>          |                                                                                                      |                                                                                                        |                                                                                                                         |
| The most frequent primary cancers in the cohort investigated | 1. breast (16.7%)<br>2. lung** (16.0%)<br>3. stomach (11.9%)<br>4. colon (11.8%)<br>5. rectum (8.7%) | 1. rectum (11.4%)<br>2. breast (11.3%)<br>3. cervix (10.9%)<br>4. stomach (9.1%)<br>5. prostate (5.0%) | 1. lung (27.8%)<br>2. esophagus/stomach (9.7%)<br>3. colorectal cancer (8.8%)<br>4. breast (8.8%)<br>5. pancreas (7.7%) |
| The most frequent metastasis sites                           | 1. abdom. LN (49.5%)<br>2. liver (49.4%)<br>3. lung (46.5%)                                          | 1. reg./dist. LN (20.5%/12.9%)<br>2. liver (11.1%)                                                     | 1. liver (59%)<br>2. dist. LN (53%)<br>3. lung (44%)                                                                    |

|  |                                 |                                   |               |
|--|---------------------------------|-----------------------------------|---------------|
|  | 4. mediast. lymph nodes (42.1%) | 3. lung (10.7%)<br>4. bone (6.5%) | 4. bone (38%) |
|--|---------------------------------|-----------------------------------|---------------|

# Therapy data not provided in the paper

\* These entities account for about 95% of all cases.

\*\* No distinction between NSCLC and SCLC

LN = lymph nodes
